# Supplementary material for: Morpho-Physiological and Biochemical Responses of Hydroponically Grown Basil Cultivars to Salt Stress
Source: MDPI journal article supplement (doi:10.3390/antiox11112207), 2022-11-08
Supplement: s1 [file s1]

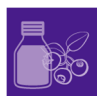

**Supplementary Table S1.** Effect of basil cultivars (CV) and stress (S) on plant height, leaf number, leaf area, total dry weight, and total dry matter.

| Treatment            | Plant height<br>cm | Leaf number<br>n. plant <sup>-1</sup> | Leaf area<br>cm <sup>2</sup> | Total dry weight<br>g plant <sup>-1</sup> | Total Dry matter<br>% |
|----------------------|--------------------|---------------------------------------|------------------------------|-------------------------------------------|-----------------------|
| <b>Cultivar (CV)</b> |                    |                                       |                              |                                           |                       |
| Anise                | 46.04 ± 2.53 a     | 233.22 ± 25.97 a                      | 1587.66 ± 184.58 a           | 15.33 ± 1.52 a                            | 13.24 ± 0.80          |
| Cinnamon             | 46.53 ± 2.16 a     | 235.47 ± 10.01 a                      | 1473.43 ± 99.68 a            | 14.89 ± 0.42 a                            | 12.19 ± 1.33          |
| Lemon                | 42.39 ± 4.09 b     | 209.14 ± 26.93 b                      | 1213.58 ± 218.65 b           | 10.31 ± 1.86 b                            | 13.07 ± 0.63          |
| <b>Stress (S)</b>    |                    |                                       |                              |                                           |                       |
| Control              | 51.43 ± 0.47       | 271.72 ± 5.85                         | 1791.55 ± 54.93              | 16.19 ± 0.68                              | 10.92 ± 0.45          |
| Salt                 | 38.54 ± 1.36       | 180.17 ± 10.12                        | 1058.23 ± 88.05              | 10.83 ± 1.23                              | 14.75 ± 0.32          |
| <b>CV × S</b>        |                    |                                       |                              |                                           |                       |
| Anise × Control      | 51.56 ± 1.11 a     | 290.00 ± 7.09 a                       | 1991.39 ± 7 3.53 a           | 18.63 ± 0.49 a                            | 11.62 ± 0.2 b         |
| Anise × Salt         | 40.52 ± 0.56 b     | 176.44 ± 9.97 d                       | 1183.93 ± 44.02 c            | 12.03 ± 0.67 c                            | 14.86 ± 0.76 a        |
| Cinnamon × Control   | 51.22 ± 0.81 a     | 256.11 ± 7.56 b                       | 1681.39 ± 18.71 b            | 15.53 ± 0.63 b                            | 9.27 ± 0.45 c         |
| Cinnamon × Salt      | 41.83 ± 0.79 b     | 214.83 ± 4.26 c                       | 1265.47 ± 77.97 c            | 14.26 ± 0.28 bc                           | 15.10 ± 0.32 a        |
| Lemon × Control      | 51.50 ± 0.87 a     | 269.06 ± 3.31 ab                      | 1701.87 ± 19.71 b            | 14.41 ± 0.41 bc                           | 11.86 ± 0.33 b        |
| Lemon × Salt         | 33.28 ± 0.15 c     | 149.22 ± 4.89 d                       | 725.29 ± 14.65 d             | 6.20 ± 0.47 d                             | 14.29 ± 0.62 a        |
| <b>Significance</b>  |                    |                                       |                              |                                           |                       |
| CV                   | ***                | **                                    | ***                          | ***                                       | ns                    |
| S                    | ***                | ***                                   | ***                          | ***                                       | ***                   |
| CV × S               | ***                | ***                                   | ***                          | ***                                       | *                     |

Data are mean values ± standard error,  $n = 3$ . Mean comparisons were performed by Tukey HSD test for CV and by *t*-Test for S. Different letters within each columns indicate significant mean differences. ns, \*, \*\*, and \*\*\* denote non-significant or significant effects at  $p \leq 0.05$ , 0.01, and 0.001, respectively.

i

**Supplementary Table S2.** Effect of basil cultivars (CV) and stress (S) on leaf transpiration (E), leaf stomatal conductance (gs), CO<sub>2</sub> net assimilation rate, and Chlorophyll fluorescence (Fv/Fm).

| Treatment            | E                                                    | gs                                                   | ACO <sub>2</sub>                                     | Fv/Fm       |
|----------------------|------------------------------------------------------|------------------------------------------------------|------------------------------------------------------|-------------|
|                      | mol H <sub>2</sub> O m <sup>-2</sup> s <sup>-1</sup> | mol H <sub>2</sub> O m <sup>-2</sup> s <sup>-1</sup> | μmol CO <sub>2</sub> m <sup>-2</sup> s <sup>-1</sup> |             |
| <b>Cultivar (CV)</b> |                                                      |                                                      |                                                      |             |
| Anise                | 5.11 ± 0.41 b                                        | 0.18 ± 0.02 b                                        | 15.34 ± 0.75 ab                                      | 0.78 ± 0.01 |
| Cinnamon             | 5.64 ± 0.65 ab                                       | 0.20 ± 0.02 ab                                       | 16.81 ± 1.11 a                                       | 0.77 ± 0.01 |
| Lemon                | 5.97 ± 0.41 a                                        | 0.24 ± 0.02 a                                        | 15.11 ± 1.23 b                                       | 0.77 ± 0.02 |
| <b>Stress (S)</b>    |                                                      |                                                      |                                                      |             |
| Control              | 6.59 ± 0.20                                          | 0.24 ± 0.01                                          | 17.87 ± 0.50                                         | 0.79 ± 0.00 |
| Salt                 | 4.55 ± 0.22                                          | 0.17 ± 0.02                                          | 13.63 ± 0.39                                         | 0.76 ± 0.01 |
| <b>CV × S</b>        |                                                      |                                                      |                                                      |             |
| Anise × Control      | 6.02 ± 0.13                                          | 0.23 ± 0.01                                          | 16.81 ± 0.63                                         | 0.80 ± 0.01 |
| Anise × Salt         | 4.20 ± 0.10                                          | 0.13 ± 0.01                                          | 13.87 ± 0.52                                         | 0.77 ± 0.01 |
| Cinnamon × Control   | 7.05 ± 0.24                                          | 0.24 ± 0.02                                          | 19.20 ± 0.52                                         | 0.79 ± 0.00 |
| Cinnamon × Salt      | 4.23 ± 0.27                                          | 0.15 ± 0.01                                          | 14.42 ± 0.42                                         | 0.76 ± 0.01 |
| Lemon × Control      | 6.71 ± 0.36                                          | 0.25 ± 0.01                                          | 17.61 ± 0.91                                         | 0.79 ± 0.01 |
| Lemon × Salt         | 5.23 ± 0.39                                          | 0.22 ± 0.04                                          | 12.61 ± 0.70                                         | 0.75 ± 0.03 |
| <b>Significance</b>  |                                                      |                                                      |                                                      |             |
| CV                   | *                                                    | **                                                   | *                                                    | ns          |
| S                    | ***                                                  | ***                                                  | ***                                                  | *           |
| CV × S               | ns                                                   | ns                                                   | ns                                                   | ns          |

Data are mean values ± standard error,  $n = 3$ . Mean comparisons were performed by Tukey HSD test for CV and by  $t$ -Test for S. Different letters within each columns indicate significant mean differences. ns, \*, \*\*, and \*\*\* denote non-significant or significant effects at  $p \leq 0.05$ , 0.01, and 0.001, respectively.
